# Supplementary material
Source: PubMed Central journal article supplement (PMC10372988)
Supplement: jmcp.2022.28.12.1335_S001.pdf [file jmcp.2022.28.12.1335_S001.pdf]

## **SUPPLEMENTARY MATERIALS**

### **Annual costs among patients with major depressive disorder and the impact of key clinical events**

Andrew J Cutler, MD; Katelyn R Keyloun, PharmD, MS; Sara Higa, PharmD, MS; Julie Park, MPH; Machaon Bonafede, PhD, MPH; Patrick Gillard, PharmD, MS; Rakesh Jain, MD

**SUPPLEMENTARY TABLE 1** Variables Included in the Multivariable Analysis

**SUPPLEMENTARY TABLE 2** Demographics and Clinical Characteristics

**SUPPLEMENTARY FIGURE 1** Patient Selection

## Supplemental Table 1. Variables Included in the Multivariable Analysis

---

Age

Sex

Female

Male

Region

North Central versus Northeast

South versus Northeast

West versus Northeast

Unknown versus Northeast

Plan type

EPO versus Commercial

HMO versus Commercial

POS versus Commercial

PPO versus Commercial

POS with capitation versus Commercial

CDHP versus Commercial

HDHP versus Commercial

Unknown versus Commercial

Index year

Log of follow-up days

Deyo-Charlson Comorbidity Index

Alcohol dependence

Anxiety

Drug dependence

Chronic pain

Sleep disorders

Tobacco/nicotine dependence

Log of total pre-index costs

---

CDHP, consumer-driven health plan; EPO, exclusive provider organization; HDHP; high-deductible health plan; HMO, health maintenance organization; POS, point-of-service; PPO, preferred provider organization.

**Supplemental Table 2. Demographics and Clinical Characteristics**

| <b>Characteristic</b>                                    | <b>n=455,082</b> |
|----------------------------------------------------------|------------------|
| Age, mean (SD), years                                    | 41.2 (12.9)      |
| Male, n (%)                                              | 164,123 (36.1)   |
| Insurance plan type, n (%)                               |                  |
| Comprehensive                                            | 10,043 (2.2)     |
| HMO                                                      | 65,797 (14.5)    |
| PPO                                                      | 272,705 (59.9)   |
| Other <sup>a</sup>                                       | 106,537 (23.4)   |
| Days of follow-up, days                                  |                  |
| Mean (SD)                                                | 1,095 (632)      |
| Median                                                   | 922              |
| Deyo-Charlson Comorbidity Index, mean (SD)               | 0.3 (0.9)        |
| Comorbidities, n (%)                                     |                  |
| Chronic pain (back pain, fibromyalgia, chronic migraine) | 141,714 (31.1)   |
| Anxiety                                                  | 46,791 (10.3)    |
| Sleep disorders                                          | 41,202 (9.1)     |
| Substance abuse disorder                                 | 29,423 (6.5)     |

<sup>a</sup>Other includes exclusive provider organization, point-of-service (with and without capitation), consumer-driven health plan, high-deductible health plan, and unknown.

HMO, health maintenance organization; PPO, preferred provider organization; SD, standard deviation.

### Supplemental Figure 1. Patient Selection

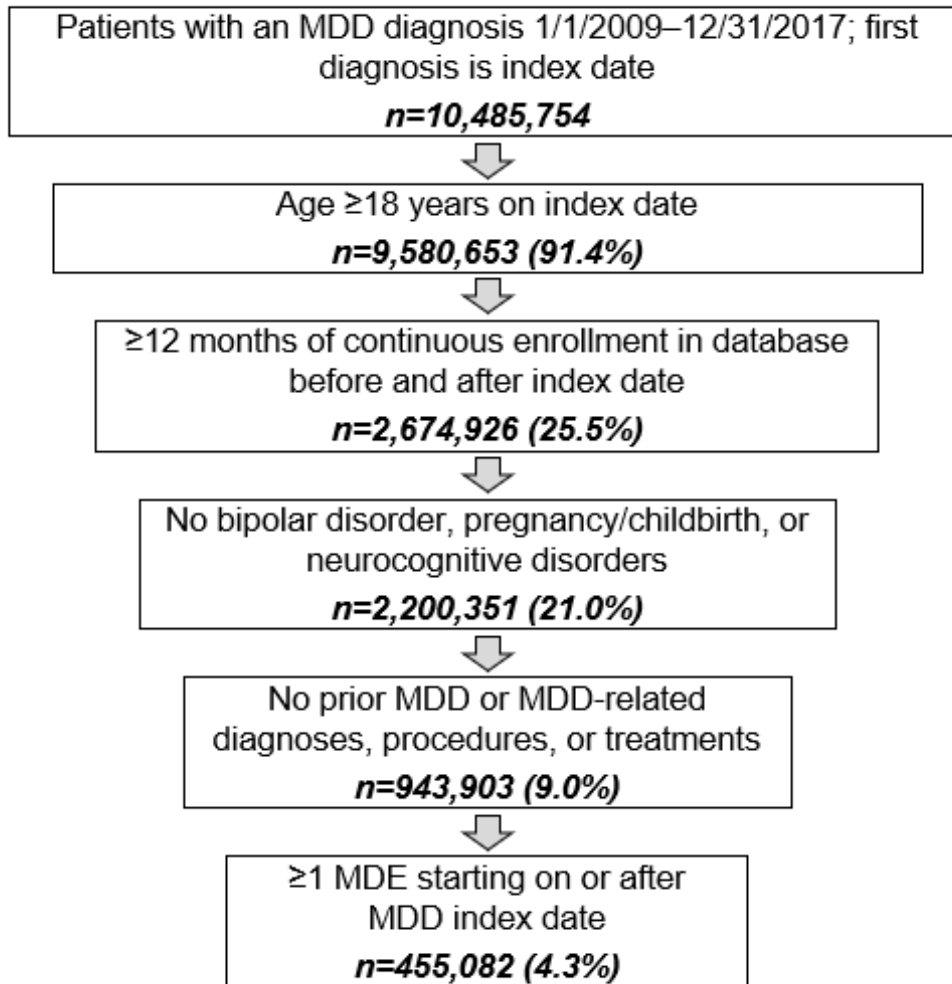

MDD, major depressive disorder; MDE, major depressive episode.
